# Supplementary material
Source: HighWire-hosted journal article supplement (https://rmdopen.bmj.com/content/4/2/e000684)
Supplement: inline-supplementary-material-1 [file inline-supplementary-material-1.docx]

**Supplementary Table 1: Key words used for Pubmed search**

| **Key words**  **and limits** | **("Arthritis, Rheumatoid"[Mesh]**  **OR "Spondylarthropathies"[Mesh]**  **OR "Polymyositis"[Mesh]**  **OR "Lupus Erythematosus, Systemic"[Mesh]**  **OR "Mixed Connective Tissue Disease"[Mesh]**  **OR "Scleroderma, Systemic"[Mesh]**  **OR "Gout"[Mesh]**  **OR "Chondrocalcinosis"[Mesh]**  **OR "Polymyalgia Rheumatica"[Mesh]**  **OR "Giant Cell Arteritis"[Mesh]**  **OR "Still's Disease, Adult-Onset"[Mesh]**  **OR "Systemic Vasculitis"[Mesh]**  **OR "Behcet Syndrome"[Mesh])**  **AND ("Patient Compliance"[Mesh]**  **OR "Medication Adherence"[Mesh])**  **AND (English[lang] OR French[lang])** |
| --- | --- |
